# Supplementary material
Source: MDPI journal article supplement (https://www.mdpi.com/2673-8023/3/1/14)
Supplement: s1 [file s1]

# Supplementary Information for Barrier Performance of Spray Coated Cellulose Nanofibre Film

Kirubanandan Shanmugam <sup>1,\*</sup>, Narendhar Chandrasekar <sup>2</sup> and Ramachandran Balaji <sup>3</sup>

<sup>1</sup> Saveetha School of Engineering, SIMATS, Chennai 602107, Tamil Nadu, India

<sup>2</sup> Department of BioNano Technology, Gachon University, Seongnam 13120, Gyeonggi, Republic of Korea

<sup>3</sup> Department of Chemical Engineering and Biotechnology, National Taipei University of Technology, Taipei 10608, Taiwan

\* Correspondence: kirubanandan.shanmugam@gmail.com

Scanning Electron Microscopy Micrograph

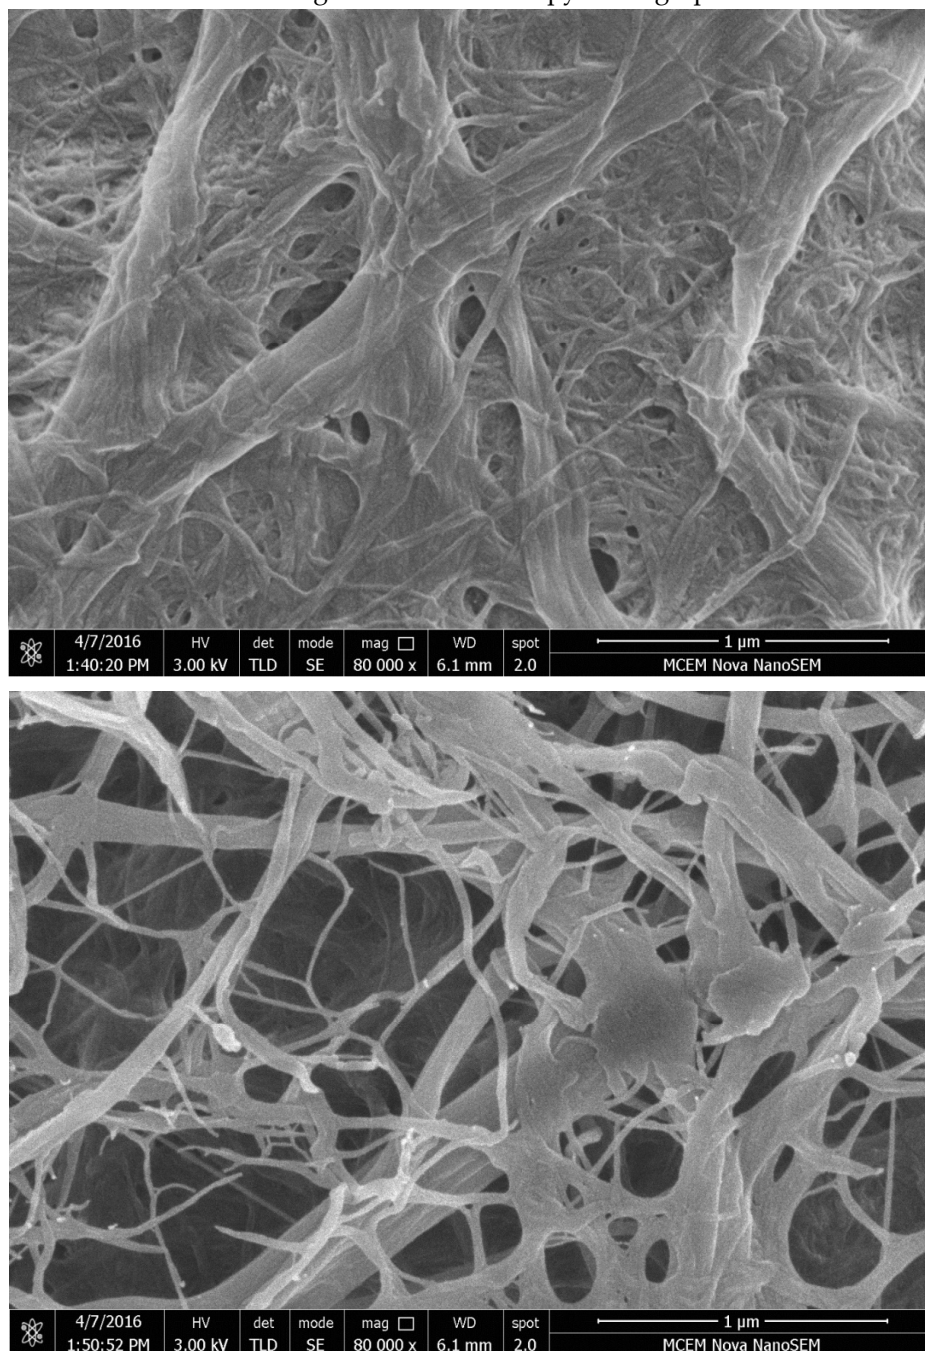

S1—Rough and Smooth Surface of Spray Coated CNF Film's SEM Micrographs

Figure S1. SEM Micrographs of Rough and Smooth Surfaces of CNF Film.

## Optical Profilometry Images

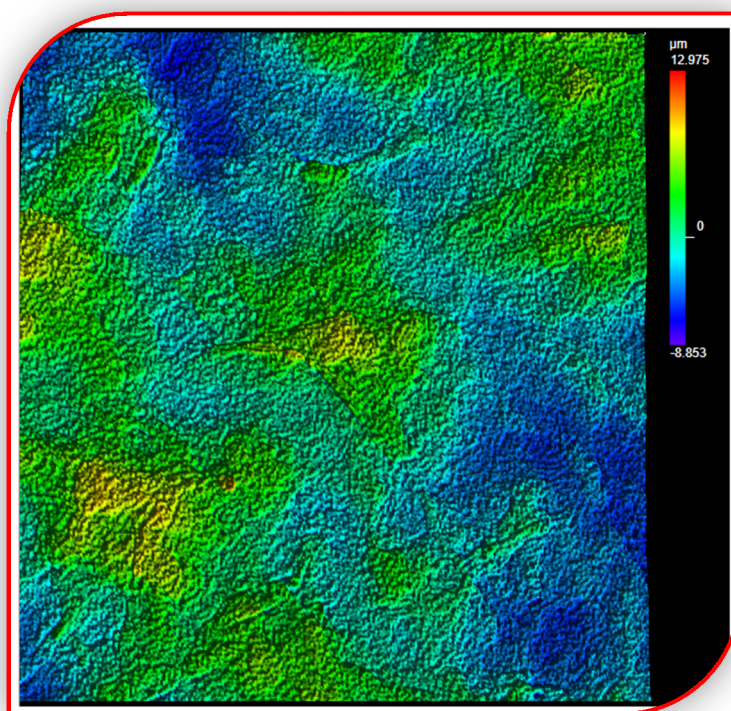

S2-1—Optical Profilometry Image of Rough Side of CNF Film

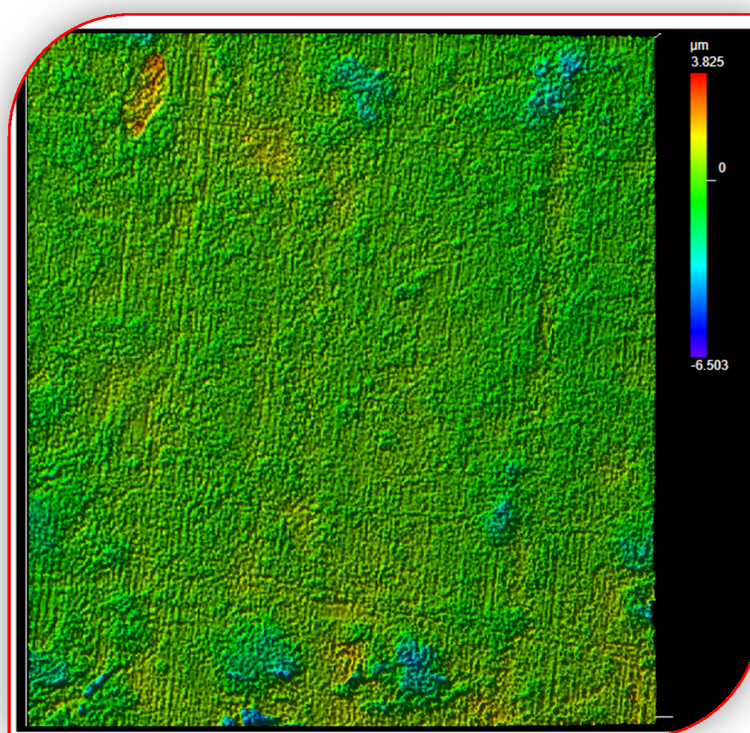

S2-2—Optical Profilometry Image of Smooth Side of CNF Film

**Figure S2.** Optical Profilometry Images of Rough and Smooth Surfaces of CNF Film.

Atomic -+  
Force Microscopy Images

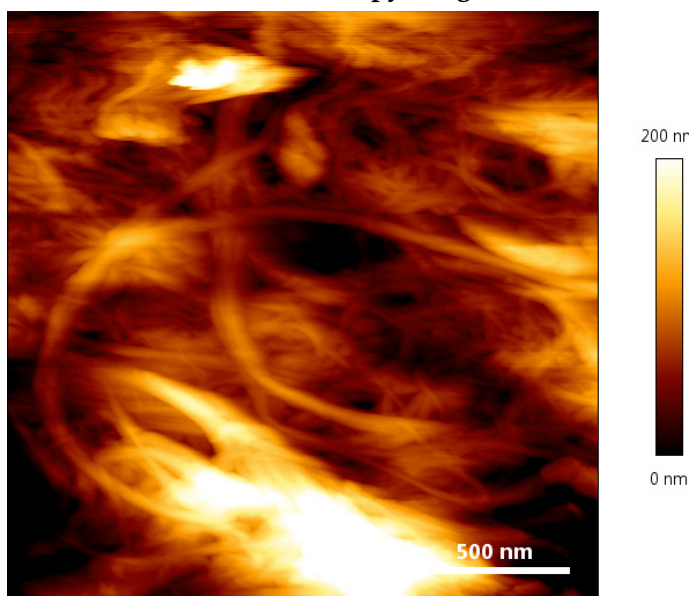

S3-1—AFM micrograph of Rough side of spray coated CNF film

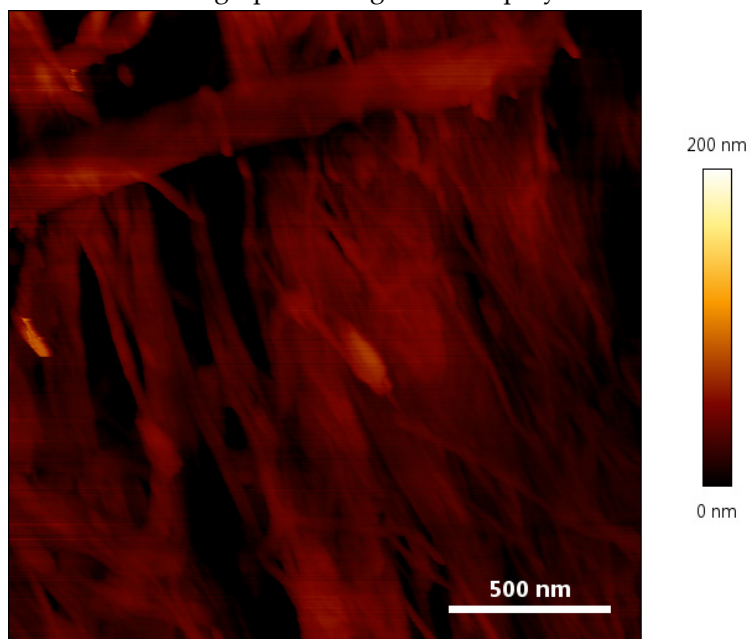

S3-2—AFM micrograph of smooth surface of CNF film

**Figure S3.** Optifcal Profilometry Images of Rough and Smooth Surfaces of CNF Film.

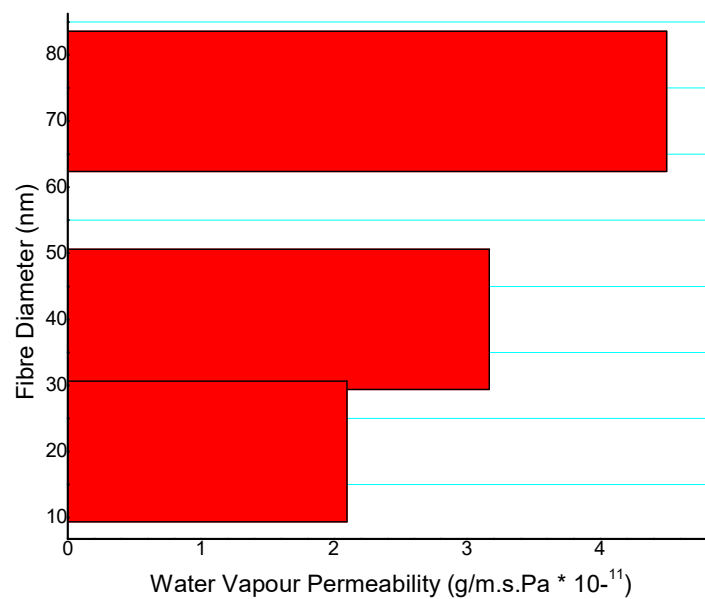

S4—Effect of fibre diameter on the WVP of CNF film

**Figure S4.** Optifcal Profilometry Images of Rough and Smooth Surfaces of CNF Film.
